# Supplementary material
Source: PubMed Central journal article supplement (PMC2699217)

# Supplementary Figure 1

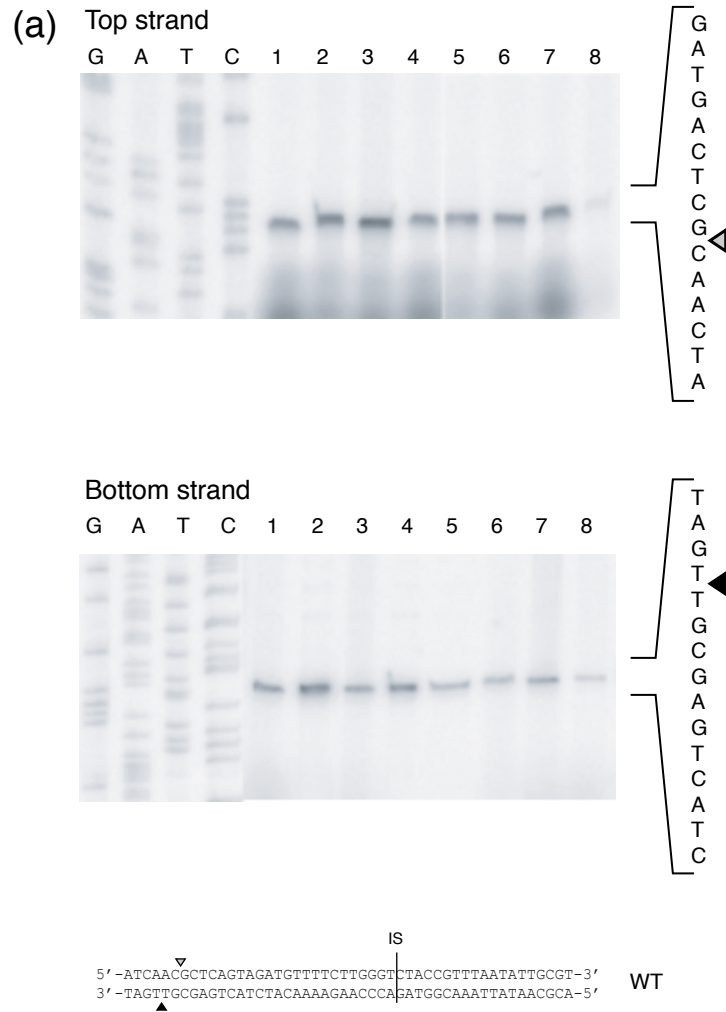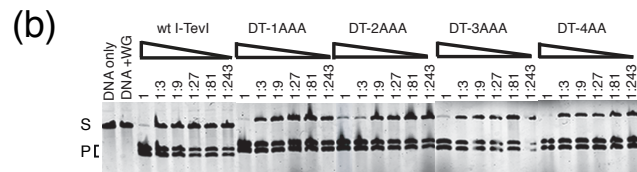

Supplement: NIHMS117216-supplement-Sup_Fig_1.pdf [file NIHMS117216-supplement-Sup_Fig_1.pdf]

# Supplementary Figure 2

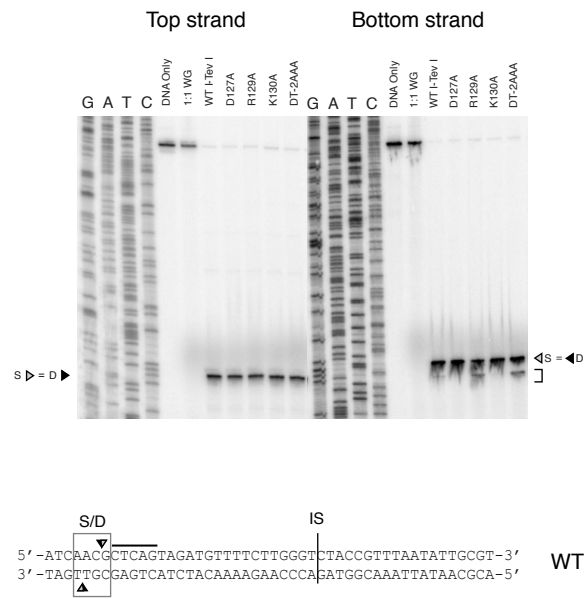

Supplement: NIHMS117216-supplement-Sup_Fig_2.pdf [file NIHMS117216-supplement-Sup_Fig_2.pdf]

# Supplementary Figure 3

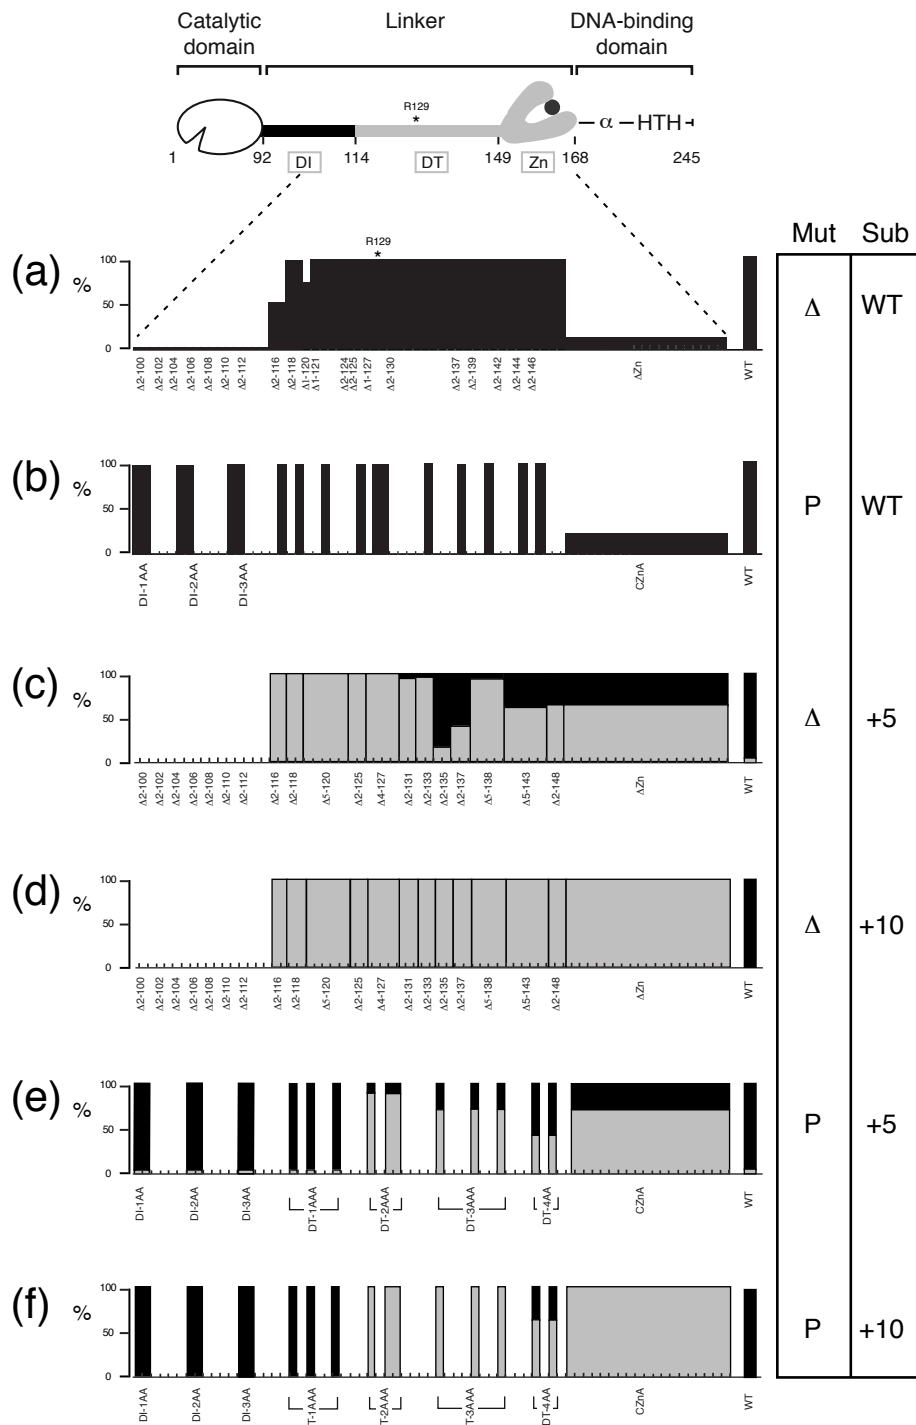

Supplement: NIHMS117216-supplement-Sup_Fig_3.pdf [file NIHMS117216-supplement-Sup_Fig_3.pdf]
